# Supplementary material
Source: publisher figshare collection journal article supplement (https://acs.figshare.com/ndownloader/files/3858814)
Supplement: Supplementary file 1 [file 3858814]

## Supplementary Information

### Easily Processable Highly Ordered Langmuir-Blodgett Films of Quaterthiophene Disiloxane Dimer for Monolayer Organic Field-Effect Transistors

Alexey S. Sizov, Daniil S. Anisimov, Elena V. Agina, Oleg V. Borshchev, Artem V. Bakirov, Maxim A. Scherbina, Souren Grigorian, Vladimir V. Bruevich, Sergei N. Chvalun, Dmitry Yu. Paraschuk, and Sergei A. Ponomarenko\*

#### 1. Mobility distribution for monolayer LB OFETs.

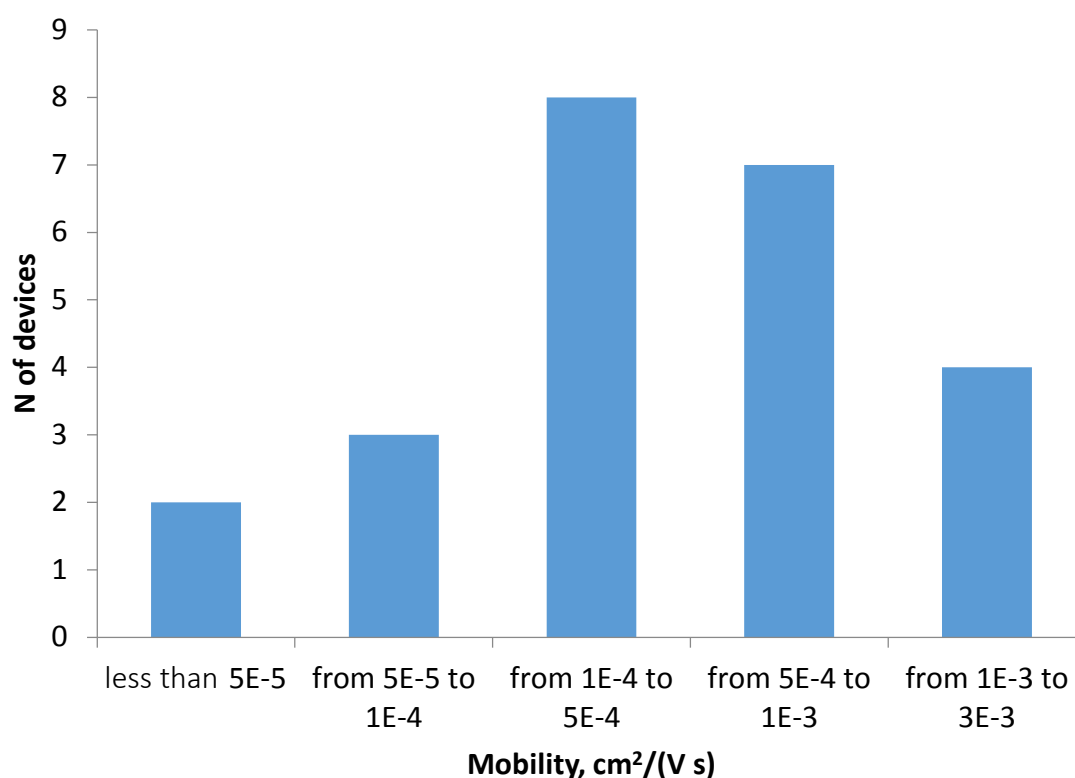

**Figure S1.** Mobility distribution for monolayer LB OFETs for 24 fabricated devices.

2. Transfer characteristics of a monolayer LB OFET as deposited and after one month on air.

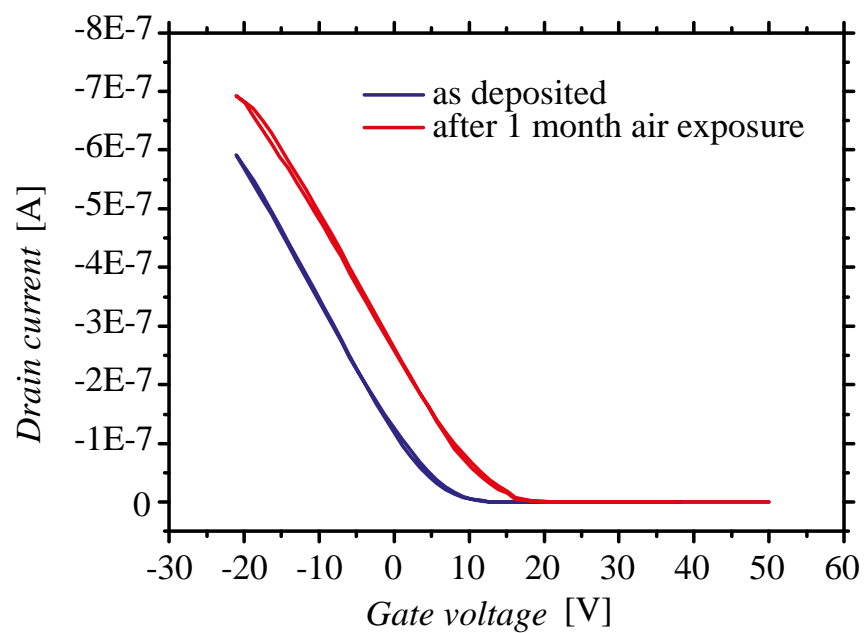

**Figure S2.** Transfer characteristics of a monolayer LB OFET as deposited and after one month on air. The extracted field-effect mobilities are  $2.6 \times 10^{-3} \text{ cm}^2/(\text{V s})$  and  $2.5 \times 10^{-3} \text{ cm}^2/(\text{V s})$  correspondingly.

### 3. Transfer characteristics of a three-layer LB OFET.

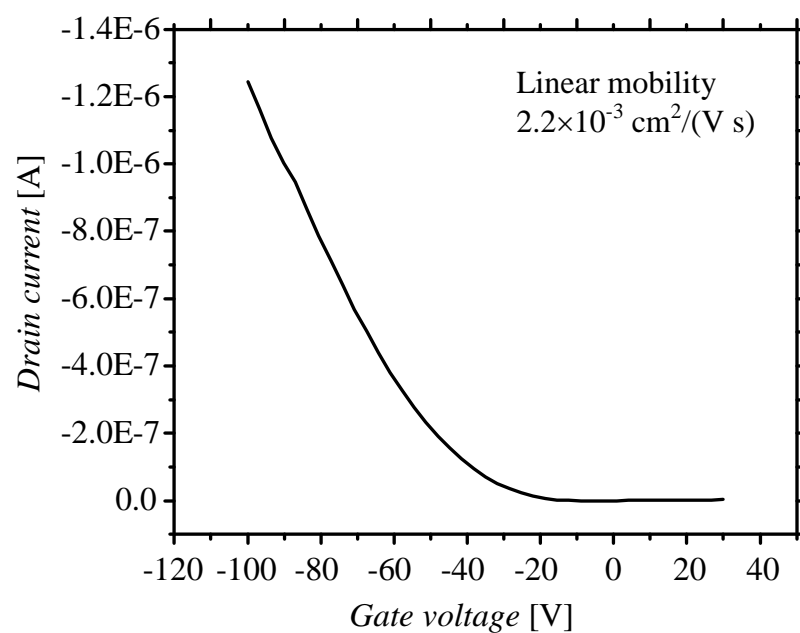

**Figure S3.** Transfer characteristics of a three-layer LB OFET. The estimated linear mobility was found to be  $2.2 \times 10^{-3} \text{ cm}^2/(\text{V s})$ .
